# Supplementary material for: N-doped carbon dots synthesized by rapid microwave irradiation as highly fluorescent probes for Pb2+ detection
Source: Royal Society of Chemistry journal article supplement (doi:10.1039/c5nj00170f), 2015-01-01
Supplement: c5nj00170f1.pdf [file c5nj00170f1.pdf]

## N-doped carbon dots synthesized by rapid microwave irradiation as highly fluorescent probe for Pb<sup>2+</sup> detection

Yuliang Jiang<sup>a,b</sup>, Yuxiang Wang<sup>a</sup>, Fandian Meng<sup>a</sup>, Bingxiang Wang<sup>b</sup>,

Yixiang Cheng<sup>a,\*</sup>, Chengjian Zhu<sup>a,\*</sup>

a Key Lab of Mesoscopic Chemistry of MOE, School of Chemistry and Chemical Engineering,  
Nanjing University, Nanjing 210093, China

b School of Chemistry and Materials Science, Nanjing Normal University, Nanjing 210097, China

### **Contents:**

**ESI 1. Determination of quantum yields**

**ESI 2. The reactant colour changed over time**

**ESI 3. FT-IR spectrum of NCDs**

**ESI 4. XPS spectra of NCDs**

**ESI 5. Fluorescence spectrum of NCDs under different pH**

**ESI 6. The stability of NCDs**

**ESI 7. The analysis result of Pb<sup>2+</sup> in water samples**

### ESI 1. Determination of quantum yields

The quantum yields of NCDs were calculated by using quinine sulfate (0.1M H<sub>2</sub>SO<sub>4</sub>, QY=0.54)

solution as reference together with the following formula:

$$QY = Q_{Yref} \times [I \times A_{ref} \times \eta^2] / [I_{ref} \times A \times \eta_{ref}^2]$$

Where QY is the quantum yield of unknown; Q<sub>Yref</sub> is the quantum yield of the reference compound;  $\eta$  is the refractive index of the solvent, I is the integrated fluorescence intensity and A is the absorbance at the excitation wavelength. The absorbances at the wavelength of excitation is optimally kept in between A = 0.02-0.05 in order to avoid inner filter effects and ensure linear response on the intensity.

### ESI 2. The reactant colour changed over time

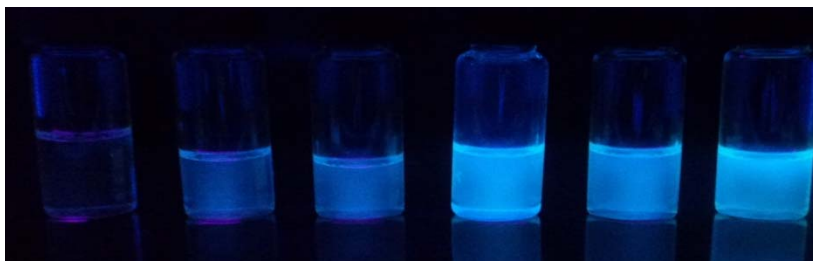

**Fig. S1** The reactant colour changed over time under ultraviolet (UV) irradiation at 365 nm (from left to right 0, 2, 5, 10, 15, 20min).

### ESI 3. FT-IR spectrum of NCDs

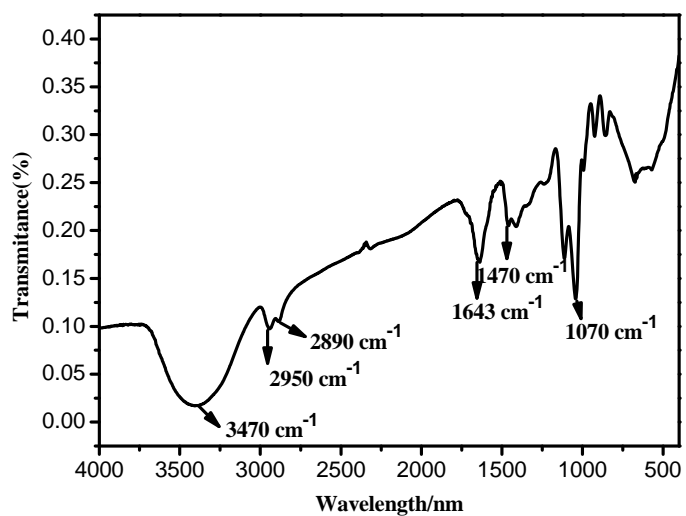

Fig. S2 The FTIR spectrum of NCDs

### ESI 4. XPS spectra of NCDs

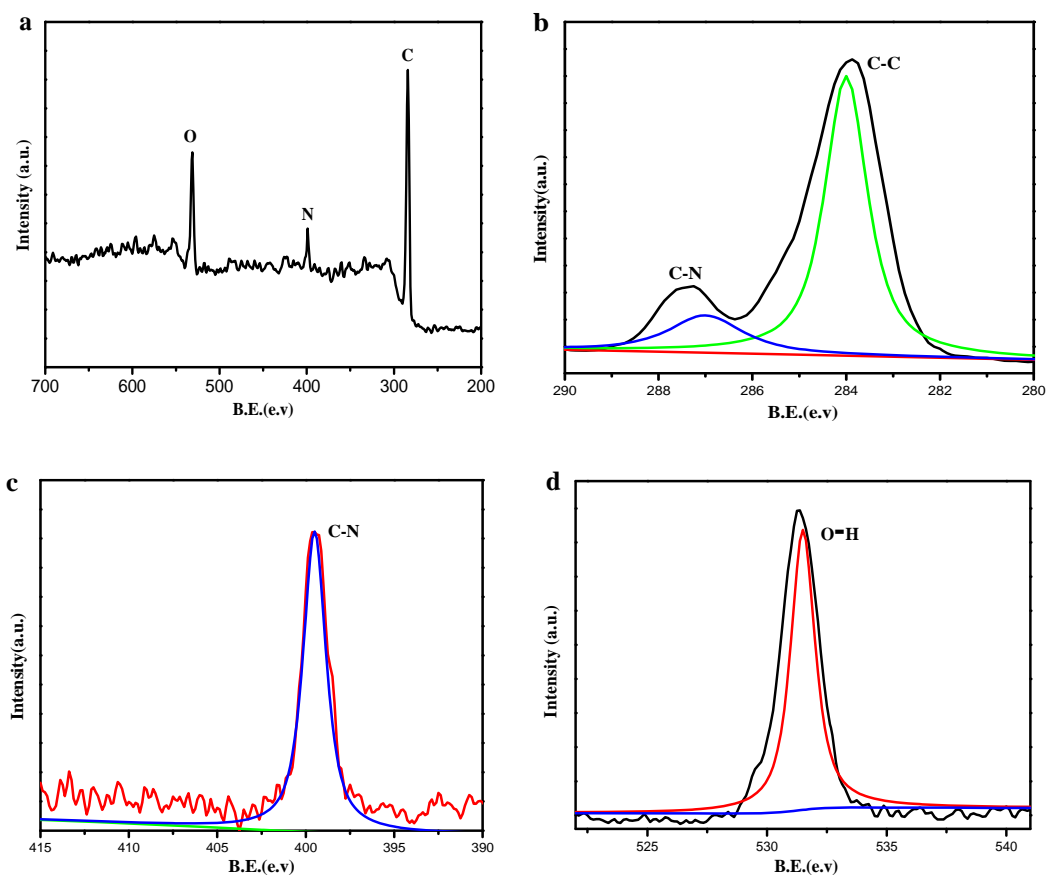

Fig. S3 a) XPS, b) C1s, c) N1s and d) O1s, spectra of the NCDs

### ESI 5. Fluorescence spectrum of NCDs under different pH

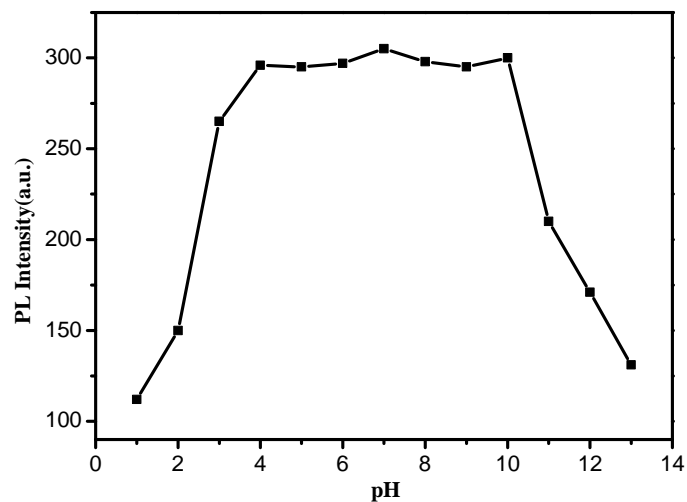

Fig. S4 The emission spectrum of NCDs under different pH form 1 to 13

### ESI 6. The stability of NCDs

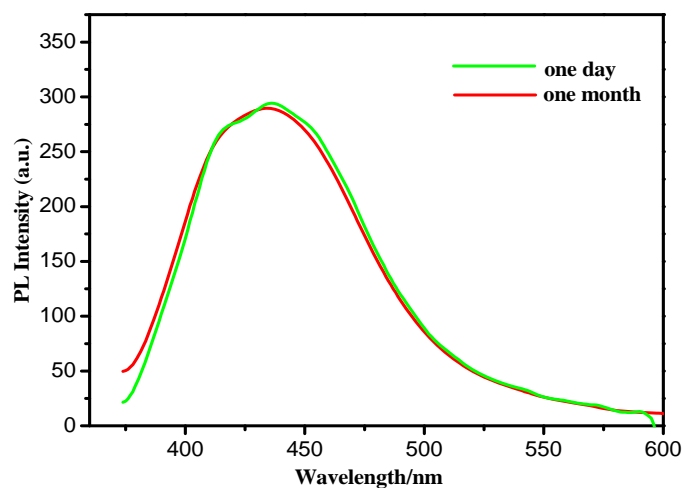

Fig. S5 The stability of NCDs

## ESI 7. The analysis result of Pb<sup>2+</sup> in water samples

**Table S1.** The analysis result of Pb<sup>2+</sup> in water samples

| Sample         | Add / nM | Found / nM | Recovery / % | RSD / % |
|----------------|----------|------------|--------------|---------|
|                | 1.00     | 0.88       | 88.00        | 3.12    |
|                | 5.00     | 5.12       | 102.00       | 2.52    |
| Drinking water | 10.00    | 10.20      | 102.00       | 3.14    |
|                | 50.00    | 49.80      | 99.60        | 1.73    |
|                | 100.00   | 99.00      | 99.00        | 2.54    |
